# Supplementary material
Source: publisher figshare collection journal article supplement (https://tandf.figshare.com/articles/dataset/_/1422121)
Supplement: Supplementary file 1 [file 1]

JOURNAL OF VERTEBRATE PALEONTOLOGY

SUPPLEMENTARY DATA 1

*Vegasaurus molyi* gen. et sp. nov. (Plesiosauria, Elasmosauridae) from the Cape  
Lamb Member (lower Maastrichtian) of the Snow Hill Island Formation, Vega Island,  
Antarctica, and remarks on Wedellian Elasmosauridae

JOSÉ P. O'GORMAN,<sup>\*,1,2</sup> LEONARDO SALGADO,<sup>3</sup> EDUARDO B.  
OLIVERO,<sup>4</sup> and SERGIO A. MARENSSI<sup>2,5</sup>

TABLE S1. Vertebral measures L (length), H (height) and B (breadth) and HI (100\*H/L), BI (100\*B/L), BHI,(100\*B/H) and VLI (100\*L/(0.5\*(H+L))) index of the *Vegasaurus molyi* gen. et sp. nov. holotype (MLP 93-1-5-1). Bold numbers represent articulated vertebrae. **C**, cervical; **P**, pectoral, **D**, dorsal, **S**, sacral, **Ca**, caudal.

| Vert.      | L  | H  | B  | HI  | BI  | BHI | VLI   |
|------------|----|----|----|-----|-----|-----|-------|
| <b>1 C</b> |    |    |    |     |     |     |       |
| <b>2</b>   |    | 23 | 29 |     |     | 126 |       |
| <b>3</b>   | 26 | 23 | 32 | 88  | 123 | 139 | 94.55 |
| <b>4</b>   | 26 | 24 | 33 | 92  | 127 | 138 | 91.23 |
| <b>5</b>   | 27 | 23 | 32 | 85  | 119 | 139 | 98.18 |
| <b>6</b>   | 30 | 28 | 34 | 93  | 113 | 121 | 96.77 |
| <b>7</b>   | 30 | 28 | 31 | 93  | 103 | 111 | 101.7 |
| <b>8</b>   | 34 | 29 | 39 | 85  | 115 | 134 | 100.0 |
| <b>9</b>   | 35 | —  | —  | —   | —   | —   | —     |
| <b>10</b>  | 32 | 27 | 38 | 84  | 119 | 141 | 98.46 |
| <b>11</b>  | 36 | 30 | 44 | 83  | 122 | 147 | 97.30 |
| <b>12</b>  | 39 | 33 | 47 | 85  | 121 | 142 | 97.50 |
| <b>13</b>  | 32 | 29 | 39 | 91  | 122 | 134 | 94.12 |
| <b>14</b>  | 40 | 33 | 48 | 83  | 120 | 145 | 98.77 |
| <b>15</b>  | 43 | —  | 49 | —   | 114 | —   | —     |
| <b>16</b>  | 44 | 37 | 52 | —   | —   | —   | —     |
| <b>17</b>  | 44 | 39 | 52 | 89  | 118 | 133 | 96.70 |
| <b>18</b>  | 45 | 39 | 54 | —   | —   | —   | —     |
| <b>19</b>  | 46 | 39 | 55 | 85  | 120 | 141 | 97.87 |
| <b>20</b>  | 51 | 39 | 55 | 76  | 108 | 141 | 108.5 |
| <b>21</b>  | —  | —  | —  | —   | —   | —   | —     |
| <b>22</b>  | 50 | 40 | 58 | —   | —   | —   | —     |
| <b>23</b>  | 52 | —  | —  | —   | —   | —   | —     |
| <b>24</b>  | 52 | 43 | 62 | 83  | 119 | 144 | 99.05 |
| <b>25</b>  | 57 | 49 | 66 | 86  | 116 | 135 | 99.13 |
| <b>26</b>  | 59 | 48 | 66 | 81  | 112 | 138 | 103.5 |
| <b>27</b>  | —  | —  | —  | —   | —   | —   | —     |
| <b>28</b>  | 58 | 50 | 70 | 86  | 121 | 140 | 96.67 |
| <b>29</b>  | 59 | 51 | 71 | 86  | 120 | 139 | 96.72 |
| <b>30</b>  | 55 | 53 | 72 | 96  | 131 | 136 | 88.00 |
| <b>31</b>  | 62 | 54 | 76 | 87  | 123 | 141 | 95.38 |
| <b>32</b>  | 58 | 55 | 76 | 95  | 131 | 138 | 88.55 |
| <b>33</b>  | 63 | 54 | 78 | 86  | 124 | 144 | 95.45 |
| <b>34</b>  | 63 | 55 | 79 | 87  | 125 | 144 | 94    |
| <b>35</b>  | 65 | 55 | 78 | 85  | 120 | 142 | 97.74 |
| <b>36</b>  | 60 | 60 | 80 | 80  | 100 | 133 | 85.7  |
| <b>37</b>  | 66 | 57 | 81 | 86  | 123 | 142 | 95.65 |
| <b>38</b>  | 67 | 56 | 84 | 84  | 122 | 146 | 0.97  |
| <b>39</b>  | 65 | —  | —  | —   | —   | —   | —     |
| <b>40</b>  | 67 | 57 | 78 | 85  | 116 | 137 | 99.26 |
| <b>41</b>  | —  | —  | —  | —   | —   | —   | —     |
| <b>42</b>  | 65 | 64 | 94 | 98  | 145 | 147 | 82.28 |
| <b>43</b>  | —  | —  | —  | —   | —   | —   | —     |
| <b>44</b>  | 65 | 66 | 87 | 102 | 134 | 132 | 84.97 |

|             |    |    |     |     |     |     |       |
|-------------|----|----|-----|-----|-----|-----|-------|
| <b>45</b>   | 64 | 66 | 91  | 103 | 142 | 138 | 81.53 |
| <b>46</b>   | 62 | —  | —   | —   | —   | —   | —     |
| 47          | 63 | 67 | 92  | 106 | 146 | 137 | 79.2  |
| 48          | 62 | 67 | —   | —   | —   | —   | —     |
| 49          | 63 | 64 | 95  | 102 | 151 | 148 | 79.25 |
| <b>50</b>   | 62 | 68 | 95  | 110 | 153 | 140 | 76.07 |
| <b>51</b>   | 63 | —  | 99  | —   | 157 | —   | —     |
| <b>52</b>   | 58 | —  | —   | —   | —   | —   | —     |
| <b>53</b>   | —  | —  | 100 | —   | —   | —   | —     |
| <b>54</b>   | 60 | 67 | 95  | 112 | 158 | 142 | 74.07 |
| <b>55P</b>  | 61 | —  | 80  | —   | 131 | —   | —     |
| <b>56</b>   | 61 | 69 | 95  | 113 | 156 | 138 | 74.39 |
| <b>57</b>   | 58 | 60 | 83  | 103 | 143 | 138 | 81.12 |
| 58D         | —  | —  | —   | —   | —   | —   | —     |
| 59          | 63 | —  | 82  | —   | 130 | —   | —     |
| 60          | —  | —  | —   | —   | —   | —   | —     |
| 61          | —  | —  | —   | —   | —   | —   | —     |
| 62          | 63 | 75 | 91  | 119 | 144 | 121 | 75.90 |
| 63          | 65 | 75 | 89  | 115 | 137 | 119 | 79.27 |
| 64          | 65 | —  | 88  | —   | 135 | —   | —     |
| 65          | —  | —  | 87  | —   | —   | —   | —     |
| 66          | 62 | 71 | 86  | 115 | 139 | 121 | 78.98 |
| 67          | 65 | 74 | 85  | 114 | 131 | 115 | 81.76 |
| 68          | 67 | 70 | 84  | 104 | 125 | 120 | 87.01 |
| 69          | 61 | 77 | 82  | 126 | 134 | 106 | 76.73 |
| 70          | 53 | 62 | 79  | 117 | 149 | 127 | 75.18 |
| 71          | —  | —  | —   | —   | —   | —   | —     |
| 72          | —  | —  | —   | —   | —   | —   | —     |
| 73          | —  | —  | —   | —   | —   | —   | —     |
| 74          | —  | —  | —   | —   | —   | —   | —     |
| 75S         | 60 | —  | —   | —   | —   | —   | —     |
| <b>76</b>   | —  | —  | —   | —   | —   | —   | —     |
| <b>77</b>   | 54 | —  | 85  | —   | 157 | —   | —     |
| <b>78Ca</b> | 47 | —  | 91  | —   | 194 | —   | —     |
| <b>79</b>   | 49 | —  | 90  | —   | 184 | —   | —     |
| 80          | 48 | 63 | —   | 131 | —   | —   | —     |
| 81          | 49 | —  | 84  | —   | 171 | —   | —     |
| 82          | 45 | —  | —   | —   | —   | —   | —     |
| 83          | 45 | 68 | 81  | 151 | 180 | 119 | 60.40 |
| 84          | 48 | 65 | 78  | 135 | 163 | 120 | 67.13 |
| 85          | 45 | 60 | 80  | 133 | 178 | 133 | 64.29 |
| 86          | 45 | 62 | 79  | 138 | 176 | 127 | 63.83 |
| 87          | 44 | 62 | 82  | 141 | 186 | 132 | 61.11 |
| 88          | 42 | 60 | 71  | 143 | 169 | 118 | 64.12 |
| 89          | 46 | 61 | 73  | 133 | 159 | 120 | 68.66 |
| 90          | 44 | 61 | 78  | 139 | 177 | 128 | 63.31 |
| 91          | 41 | 61 | 82  | 149 | 200 | 134 | 57.34 |
| 92          | 44 | 58 | 80  | 132 | 182 | 138 | 63.77 |
| 93          | 41 | —  | 86  | —   | 210 | —   | —     |
| 94          | 43 | 57 | 75  | 133 | 174 | 132 | 65.15 |
| 95          | 40 | 58 | 71  | 145 | 178 | 122 | 62.02 |
| 96          | 35 | 56 | 66  | 160 | 189 | 118 | 57.38 |
| 97          | 35 | —  | —   | —   | —   | —   | —     |
| 98          | —  | —  | —   | —   | —   | —   | —     |

|            |    |   |   |   |   |   |   |
|------------|----|---|---|---|---|---|---|
| 99         | —  | — | — | — | — | — | — |
| <b>100</b> | —  | — | — | — | — | — | — |
| <b>101</b> | —  | — | — | — | — | — | — |
| <b>102</b> | 35 | — | — | — | — | — | — |
| <b>103</b> | 34 | — | — | — | — | — | — |
| 104        | —  | — | — | — | — | — | — |
| 105        | 32 | — | — | — | — | — | — |

## CHARACTERS AND SCORING

Citation and lists for previous uses of modified characters are given by Kubo et al. (2012) modified from Sato (2002).

**Institutional Abbreviations**—**CM**, Canterbury Museum, Christchurch, New Zealand; **DM**, Museum of New Zealand Te Papa Tongarewa, Wellington, New Zealand; **MLP**, Museo de la Plata, Buenos Aires Province, Argentina; **NGS**, Nuclear and Geological Science, Lower Hut, New Zealand; **OU**, Otago Museum, Dunedin, New Zealand.

### Characters Considered Additive (following Sato, 2002)

Characters considered additives are 1, 2, 4, 5, 39, 84, 86, 87, 110, 111, 115, 118, 119, 160, 162, 175, 176, 179, 182, 183, 184, 185, 206, 207, and 214.

### List of Characters and Scoring Modifications from the Data Set of Kubo et al. (2012)

Ch. 120: Shape of the anterior cervical centra [multistate] (Welles, 1943-3; Brown, 1981-15; O'Keefe, 2001-112) Anterior cervical centrum is about as long as high (0), mostly longer than high (1), mostly higher than long (2), much longer than high (3) (nov. state). This last state is recorded in the species of the elongated group of O'Keefe and Hiller (2006).

Ch. 178: Diamond-shaped vacuity in pelvis (binary): absent (0) or present (1) is not considered in this analysis. All of the information related to the pelvic bar was condensed in Ch. 177: Pelvic midline bar (multistate) (Welles, 1943-15; Brown, 1981-30; Carpenter, 1999-20; O'Keefe, 2001-146). Present with or without diamond shape vacuity (modified state) (0), reduced or absent with truncated end (1), reduced or absent without truncated end (2).

## Scorings

**Presence of the Ventral Notch**—In taxa where only the first cervical vertebrae are known (*Tuaraingisaurus keyesi*; *Eromangasaurus australis*) Ch. 121 (shape of articular faces of cervical centra) is scored as ? because the first cervical vertebrae usually do not have the ventral notch in the articular faces of the cervical centra, even in specimens that have the ventral notch in middle cervical vertebrae.

**Scorings Modified from Literature**—Some scorings were modified based on the literature in order to maintain internal consistency in the data set.

*Callawayasaurus colombiensis*: Ch. 123(1); 124 (1&2) (Welles, 1962).

*Elasmosasurus platyurus* Ch. 121 (1) (Welles, 1943, 1952, 1962).

*Eromangasaurus australis* Ch. 92 (?) (Kear, 2007).

*Futabasaurus suzukii* Ch. 102 (1) and 110 (?) (Sato et al., 2006).

*Morenosaurus stocki* Ch. 124 (1) (Welles, 1943).

*Thalassomedon haningtoni* Ch. 124 (1&2) (Welles, 1943).

Some scorings were completely revised based on personal observation (Table S2).

**Taxa Scored Based on Personal Observation**—Taxon scoring based on personal observations are indicated in Table S2.

TABLE S2. Taxon scoring based on personal observation.

| Taxa                          | Source                                         |
|-------------------------------|------------------------------------------------|
| <i>Aristonectes parvidens</i> | Holotype MLP 40-XI-14-6                        |
| <i>Kaiwhekea katiki</i>       | Holotype (OU 12649)                            |
| <i>Vegasarus molyi</i>        | Holotype (MLP 93-I-5-1)                        |
| <i>Tuarangisaurus keyesi</i>  | Holotype (NZGS CD425) and NZGS CD426           |
| <i>Mauisaurus haasti</i>      | Holotype (DM R 1529) and referred (CM Zfr 115) |

The scoring modifications are included in the SUPPLEMENTARY DATA 2  
Vegasaurus Data Set. Nex.

#### LITERATURE CITED

- Brown, D. S. 1981. The English Upper Jurassic Plesiosauroidea (Reptilia) and a review of the phylogeny and classification of the Plesiosauroidea. Bulletin of British Museum (Natural History), Geology 35:253–347.
- Carpenter, K. 1999. Revision of North American elasmosaurids from the Cretaceous of the Western Interior. Paludicola 2:148–173.

- Kear, B. P. 2007. Taxonomic clarification of the Australian elasmosaurid genus *Eromangasaurus*, with reference to other austral elasmosaurid taxa. *Journal of Vertebrate Paleontology* 27:241–246.
- Kubo, T., M. T. Mitchell, and D. M. Henderson. 2012. *Albertonectes vanderveldei*, a new elasmosaur (Reptilia, Sauropterygia) from the Upper Cretaceous of Alberta. *Journal of Vertebrate Paleontology* 32:557–572.
- O'Keefe, F. R. 2001. A cladistic analysis and taxonomic revision of the Plesiosauria (Reptilia, Sauropterygia). *Acta Zoologica Fennica* 213:1–63.
- O'Keefe, F. R., and N. Hiller. 2006. Morphologic and ontogenetic patterns in elasmosaur neck length, with comments on the taxonomic utility of neck length variables. *Paludicola* 5:206–229.
- Sato, T. 2002. Description of plesiosaurs (Reptilia: Sauropterygia) from the Bearpaw Formation (Campanian–Maastrichtian) and a phylogenetic analysis of the Elasmosauridae. Ph.D. dissertation, University of Calgary, 391 pp.
- Sato, T., Y. Hasegawa, and M. Manabe. 2006. A new elasmosaurid plesiosaur from the Upper Cretaceous of Fukushima, Japan. *Palaeontology* 49:467–484.
- Welles, S. P. 1943. Elasmosaurid plesiosaurs with description of new material from California and Colorado. *Memoirs of the University of California* 13:125–254.
- Welles, S. P. 1952. A review of the North American Cretaceous elasmosaurs. *University of California Publications in Geological Sciences* 29:47–144.
- Welles, S. P. 1962. A new species of elasmosaur from the Aptian of Colombia and a review of the Cretaceous plesiosaurs. *University of California Publications in Geological Sciences* 44:1–96.
